# Supplementary material for: Current rapid global temperature rise linked to falling SO&lt;sub&gt;2&lt;/sub&gt; emissions
Source: Copernicus journal article supplement (doi:10.5194/esd-2018-83), 2018-11-30
Supplement: Supplementary file [file esd-2018-83-RC1-supplement.pdf]

## **Review of 'Current rapid global temperature rise linked to falling SO<sub>2</sub> emissions' by Nick E. B. Cowern**

### *Summary*

This submitted discussion paper contends that the recent rapid warming in global mean surface temperatures (more commonly referred to as GMST) arises primarily as a result of recent clean air efforts that have reduced the sulphate emissions and thus aerosol burden. That rapid efforts to clean up aerosol emissions could lead to a short-term warming spike has long been recognised. Observational proof of this signal emerging, if indeed it is, would be a valuable addition to the literature. However, as written and analysed I do not find the paper convincing for reasons that I will further articulate below. At its most basic I believe the problem to be too simplified to be able to conclude with requisite confidence a cause. My view is that a substantive rewrite would be required to address these concerns and that these go far beyond major corrections, requiring very extensive work to address.

However, equally, I would not wish my comments to discourage the author from pursuing the work as I think the issue is very important to assess. That said, It is important to recognise that there exists a broad spectrum of opinions within the scientific community as to whether there is value in the analysis of very recent trends and their causes. This is most evident in the analysis of the early 21<sup>st</sup> Century reduction in warming variously termed a 'hiatus', 'Pause' etc. Personally, I am of the view that there is indeed value in this. If the community do not make efforts to understand recent / ongoing changes I feel that we do global society a disservice. It is natural for decision makers, policy makers and society to want to better understand recent climate and what that portends upon various short to medium term planning horizons.

### *Stylistic concerns*

Before going into scientific details, I make a couple of comments on style:

Firstly, I suspect that this had been written for submission to a high profile short-form letters journal and has been resubmitted for publication here following rejection. This is obvious from at least one allusion to a numerical reference as well as the fact that all methods are supplementary information. ESD is not a letters form journal and I find it inappropriate to relegate the methodological detail to the SI. This detail should arguably be front and centre in the paper for this journal. Ultimately this decision, rightly, would rest with the editor, but personally I find the relegation of the necessary methodological detail to the SI unsatisfactory.

Secondly, the piece is grossly under-referenced with references being almost entirely to the work of a single lead author. The lack of citing a balanced sample of the literature around the hiatus and surge is a major issue. Readers need to be correctly oriented to where the piece falls into place holistically within the wealth of recent literature on the topic. At a minimum references to one or more hiatus synthesis / review papers would be appropriate along with associated interpretation thereof in the context of the present piece.

Furthermore, there is a lack of citation of data sources. Even after several careful reads I am

none the wiser which surface temperature dataset is being analysed and similarly which OHC, forcing estimates etc. etc.. These are basic issues that greatly negative impact whether the piece is publishable as it stands.

### *Analysing at the global mean scale*

The analysis is performed exclusively at the global mean scale. This significantly limits the ability to discriminate between competing hypotheses to the point where, in my judgement, it becomes impossible to unambiguously disentangle causes.

For the past two decades detection and attribution approaches have been searching using correlation or regression approaches for spatio-temporal agreement between model estimates of the responses to forcings and observations. Given the short lifetime of sulphate aerosols and the apparent strong spatio-temporal signal in emissions a properly designed set of model runs could be compared to the observations under e.g. the approach of Allen and Stott, 2000. This would enable a more certain conclusion to be reached. Limiting the analysis to global mean and timeseries congruence is insufficient to alight upon a single principal cause, that is if there is a single principal cause, of observed behaviour. There may be relevant model runs that can be used arising from CPDN citizen science ensemble, the NorESM ensemble described in Outten et al., 2015 or the recently completed very large ensemble at MPI. The single forcings runs of NASA GISS may also be informative.

Failing recourse to a formal detection and attribution analysis, there would be significant value in at least showing and analysing the spatio-temporal evolution in the observations with an associated analysis on plausible aerosol impacts. This may involve recourse to observations of both aerosol and temperature changes resolved spatially. A spatio-temporal correlation of the two fields may be informative in building confidence as to cause and effect.

### *Observational uncertainty*

Beyond the fact that I cannot discern which observational record of GMST is employed at present, a much more substantive issue is that only one observational record is analysed. There are numerous surface temperature analyses, including several modern reanalysis datasets (see Simmons et al., 2017 in QJRMS). A list of plausible datasets to consider would include, but not necessarily be limited to:

- HadCRUT4
- Cowtan and Way
- NASA GISS
- NOAA Globtemp
- Berkeley Earth
- JMA
- JRA-55
- ERA-Interim / ERA5

Inclusion of the range of datasets would enable exploration of sensitivity of results to choice of datasets. Furthermore, some of these products are now ensemble products that permit an exploration of parametric uncertainty in these products. Showing that the analysis is

robust to choice of dataset and published dataset uncertainty estimates would greatly improve the analysis.

Similarly, there is uncertainty in estimates of ENSO, OHC and the various forcings being considered (not least the anthropogenic aerosols) and similar consideration of the ensemble of opportunity presented by observationally based estimates, including atmospheric composition reanalysis products, would be greatly beneficial.

I see insufficiently robust analysis of the quality of the OMI aerosol product upon which the attribution inference principally rests. Where is reference to the papers describing the product and its verification? Does the product come with uncertainty estimates? If so, these should be used. What does the spatially sparse AERONET network show? What do available lidars show? What do other space-based instruments capable of discerning aerosol properties such as the hyperspectral sounders show?

#### *Exclusion of plausible natural modes of variability*

The analysis attempts, reasonably, to remove the impacts of ENSO. That ENSO has a substantive effect on the GMST on inter-annual timescales is well known and beyond dispute, as is the lag (although a reference to support this would be advisable). That said, the use of an apparent multiplicative effect of 0.1 seems unduly deterministic. The available finite sample of ENSO events probably means that only a range, likely centred around 0.1, is defensible. This range should be quantified and used.

The bigger issue is the implicit assumption that once ENSO is removed there exist no other important mechanisms of natural variability. That assumption is, of course, over-simplistic. There are very many major modes of variability that have power across a broad range of timescales and project strongly onto regional and / or global surface temperatures. These modes do not necessarily solely arise in OHC but may be driven by e.g. sea-ice changes or land cover responses. Variability can lead to multi-annual excursions around a long-term trend driven by changes in large-scale climate forcings. Climate model control runs highlight that, as simulated, the climate can support multi-annual to multi-decadal excursions from climatology in the absence of forcings. Such excursions do not result solely from ENSO variability or changes in near-surface ocean layers.

#### *Earth System Temperature Metric*

I find this metric intuitively interesting. However, the explanation as given is insufficient for me, and therefore presumably your readers, to assess its efficacy or properties. It should be better explained and thought given as to how to prove its utility which may include, for example, its application to various climate model simulations, prior to application to and analysis against real-world observations. This would strengthen the analysis considerably.

#### *Further questions*

1. The QBO is a stratospheric mode of variability how can it be removed with the earth system temperature metric? The metric does not include any stratospheric

contribution. I find the analysis in this regard unconvincing. It may be ameliorated by moving SI to the main text.

2. There is a question that bedevilled hiatus papers around statistical / practical significance. For short timescales in ARMA series statistical significance even on a decadal scale of changes in rate are highly questionable. I am unconvinced of statistical significance. Then there is the question of practical significance. The hiatus was not statistically significant, but it was for practical intents a departure. I suspect the same ambiguity pertains to the recent surge-like behaviour, at least in so far as it exists to date. Likely several more years of rapid warming would be required to attain statistical significance? Careful thought would appear warranted around how to communicate this issue.
